# Supplementary material
Source: PubMed Central journal article supplement (PMC5177541)

Appendix 3. EHR-OSCE (Electronic Health Record Objective Structured Clinical Examination) Room Schematic.

This schematic represents the layout used for the EHR-OSCE. The computer, laptop table, and its stool are pushed against the wall at the start of every scenario. When the rooms are equipped with video recording or two way mirrors, faculty are not required to be in the room.

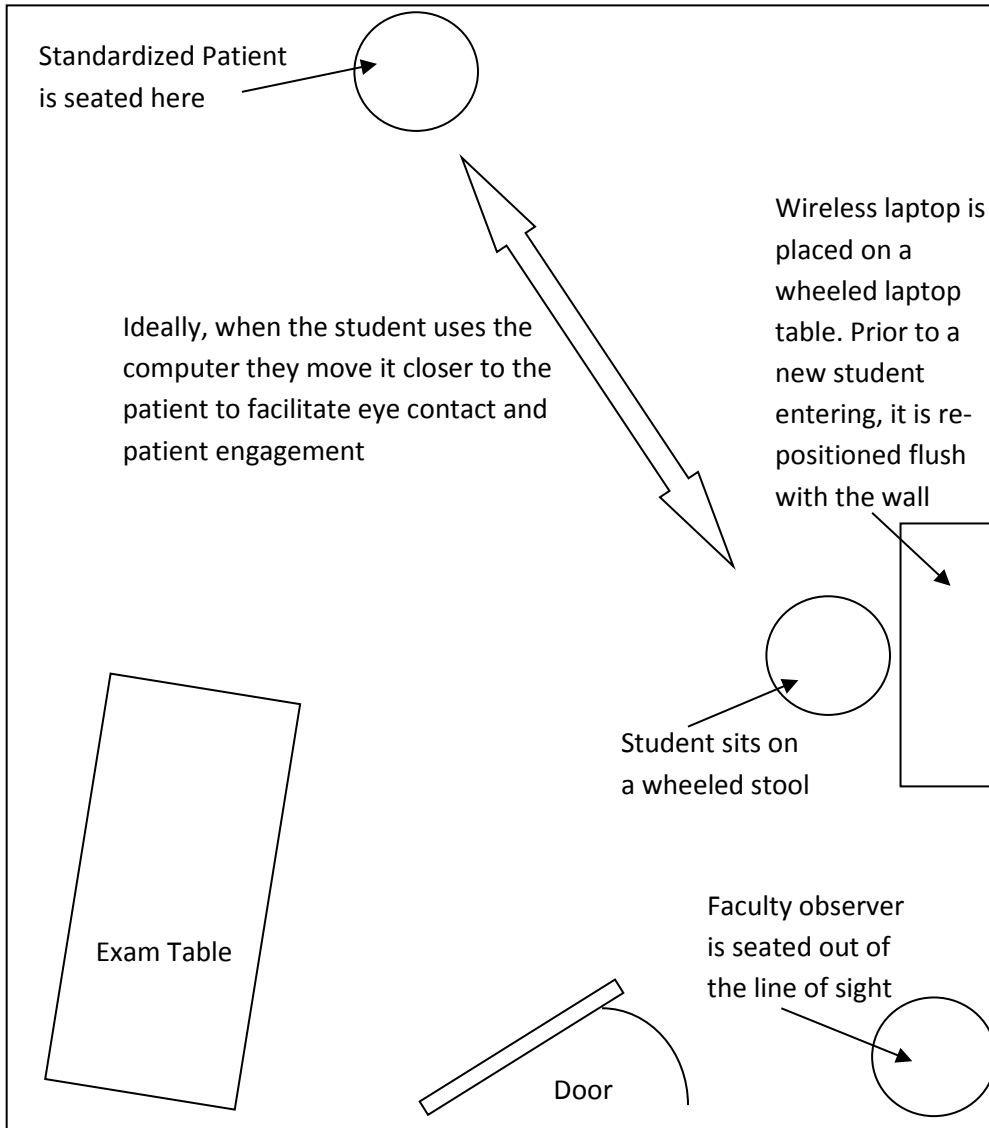

Supplement: NIHMS799379-supplement-SM.pdf [file NIHMS799379-supplement-SM.pdf]
